# Supplementary material for: Boronate affinity-based photoactivatable magnetic nanoparticles for the oriented and irreversible conjugation of Fc-fused lectins and antibodies
Source: Royal Society of Chemistry journal article supplement (doi:10.1039/c9sc01613a), 2019-01-01
Supplement: c9sc01613a1.pdf [file c9sc01613a1.pdf]

## SUPPLEMENTARY INFORMATION

### **Boronate Affinity-based Photoactivatable Magnetic Nanoparticles for Oriented and Irreversible Conjugation of Fc-Fused Lectin and Antibody**

Chen-Yo Fan,<sup>a</sup> Yi-Ren Hou,<sup>a</sup> Avijit K. Adak,<sup>a</sup> Juanilita T. Waniwan,<sup>b</sup> Mira Anne C. dela Rosa,<sup>b</sup> Penk-Yeir Low,<sup>c</sup> Takashi Angata,<sup>c</sup> Kuo-Chu Hwang,<sup>a</sup> Yu-Ju Chen,<sup>b,\*</sup> Chun-Cheng Lin<sup>a,d,\*</sup>

<sup>a</sup>Department of Chemistry, National Tsing Hua University, Hsinchu, Taiwan;

<sup>b</sup>Institute of Chemistry and <sup>c</sup>Institute of Biological Chemistry, Academia Sinica, Taipei, Taiwan.

<sup>d</sup>Frontier Research Center on Fundamental and Applied Sciences of Matters

Corresponding Author: Chun-Cheng Lin

Email: [cclin66@mx.nthu.edu.tw](mailto:cclin66@mx.nthu.edu.tw) and [yujuchen@gate.sinica.edu.tw](mailto:yujuchen@gate.sinica.edu.tw)

#### **Contents:**

|                                                                                                                              |      |
|------------------------------------------------------------------------------------------------------------------------------|------|
| Materials and Method.....                                                                                                    | P3   |
| Synthesis of biotinylated sialoside <b>1</b> (Scheme S1) .....                                                               | P3   |
| Synthesis of N-hydroxysuccinimide ester triethoxysilane <b>2</b> , photo-reactive alkyl diazirine <b>4</b> (Scheme S2) ..... | P4   |
| Synthetic procedures and characterization of compounds.....                                                                  | P4-7 |
| TEM characterization of MNPs (Figure S1).....                                                                                | P7   |
| Effect of UV irradiation time on the immobilization of Siglec-2-Fc on BA-Diaz@MNPs <b>C</b> (Figure S2) .....                | P7-8 |
| Non-reducing SDS-PAGE gel analysis of the Siglec-2-Fc@MNPs (Figure S3).....                                                  | P8   |

|                                                                                                                            |        |
|----------------------------------------------------------------------------------------------------------------------------|--------|
| Comparison of relative binding activity of Siglec-2-Fc immobilized on MNPs ( <b>Figure S4</b> )                            | P9     |
| Standard curve of BSA quantified by BCA assay ( <b>Figure S5</b> )                                                         | P9-10  |
| Liquid Chromatography-Tandem Mass Spectrometry (LC-MS/MS) Analysis LC-MS/MS Method                                         | P10-11 |
| Protein Identification and Label Free Quantitation                                                                         | P11    |
| Identified glycoproteins enriched by Siglec-2-BA-Diaz@MNP C and Siglec-2-BA-Diaz-DSS@MNP                                   | P12    |
| Glycoproteins and peptides identification analyzed by Thermo LTQ Orbitrap Velos ( <b>Figure S6</b> )                       | P12    |
| Proteins identified with BA-Diaz@MNP enrichment on BJAB cells ( <b>Table S1</b> )                                          | P13-16 |
| Glycoproteins identified in BJAB cells by Siglec-2-BA-Diaz@MNPs on BA-Diaz-NHS@MNP and BA-Diaz-DSS@MNP ( <b>Table S2</b> ) | P16-20 |
| <sup>1</sup> H and <sup>13</sup> C NMR characterization of compound <b>1</b> , <b>2</b> , and <b>4</b>                     | P21-26 |
| Reference                                                                                                                  | P27    |

## Materials and Methods

For chemical synthesis, all starting materials and commercially obtained reagents were purchased from Sigma-Aldrich and used as received unless otherwise noted. All reactions were performed in oven-dried glassware under nitrogen atmosphere using dry solvents.  $^1\text{H}$  and  $^{13}\text{C}$  NMR spectra were recorded on Bruker AV-400 spectrometer operating at 400 and 100 MHz, respectively, and were referenced to the solvent used ( $\text{CDCl}_3$  at  $\delta$  7.24 and 77.23, and  $\text{CD}_3\text{OD}$  at  $\delta$  3.31 and 49.2 for  $^1\text{H}$  and  $^{13}\text{C}$ , respectively). Chemical shifts ( $\delta$ ) are reported in ppm using the following convention: chemical shift, multiplicity (s = singlet, d = doublet, t = triplet, q = quartet, m = multiplet), integration, and coupling constants ( $J$ ), with  $J$  reported in Hz. High-resolution mass spectra were recorded under ESI-TOF mass spectroscopy conditions. Analytical thin-layer chromatography (TLC) was performed on pre-coated plates (silica gel 60). Silica gel (E, Merck) was used for flash chromatography. Transmission electron microscopy (TEM) images were obtained by a JEM-2100 electron microscope with an operating voltage of 200 kV.

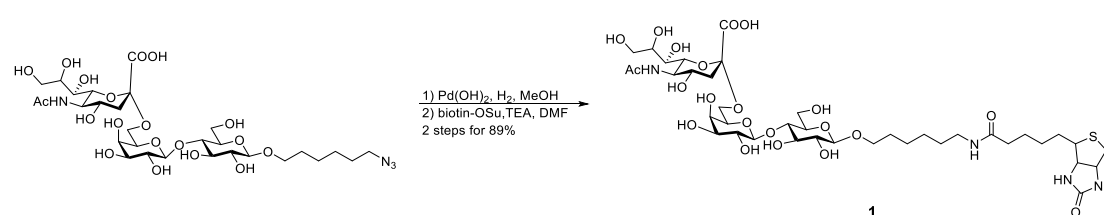

**Scheme S1.** Synthesis of biotinylated sialoside **1**.

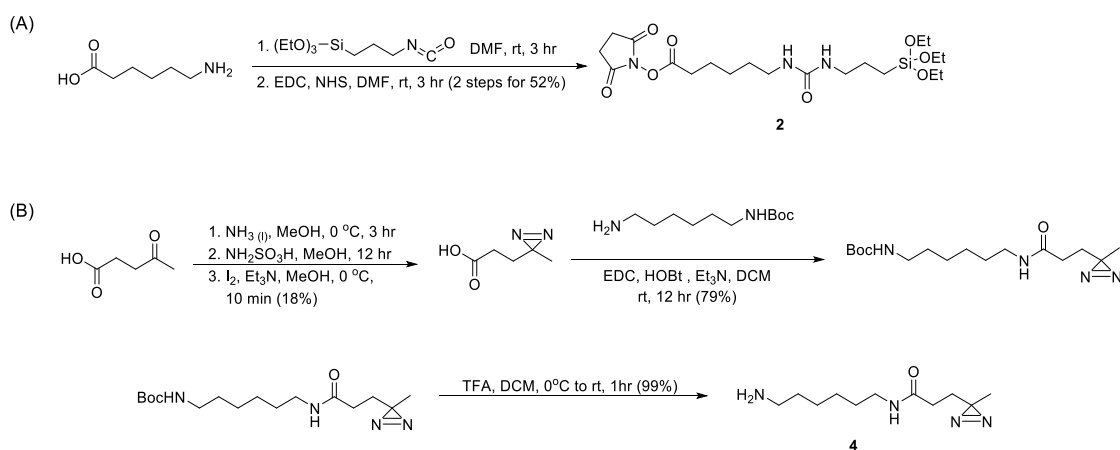

**Scheme S2.** (A) Synthesis of *N*-hydroxysuccinimide ester triethoxysilane **2**. (B) Synthesis of photo-reactive alkyl diazirine **4**.

**Compound 1.** To a solution of NeuA $\alpha$ (2,6)Gal $\beta$ (1,4)Glc<sup>2</sup> (0.026 mmol) in MeOH (0.6 mL) was added palladium hydroxide (Pd(OH)<sub>2</sub>, 20% Pd content, 4 mg). The mixture was stirred at rt under atmosphere of hydrogen gas for 6 h. The solution was filtered through a pad of Celite. The residue was concentrated to dryness in *vacuo* and the resulting residue was dissolved in DMF (0.6 mL). *N*-Succinimide-biotin (0.039 mmol) was added to the mixture and then stirred at rt for 6 h. The solution was concentrated to dryness in *vacuo* and the resulting residue was purified by C18 reverse phase silica column (Sep-Pak Vac C18 cartridge 20cc/5g 37-55  $\mu$ m) to give **1** (20 mg, 80% for 2 steps). <sup>1</sup>H NMR (400 MHz, D<sub>2</sub>O)  $\delta$  4.62 (dd, *J* = 4.8, 12.8 Hz, 1H), 4.49 (d, *J* = 8.0 Hz, 1H), 4.44 (d, *J* = 8.0 Hz, 2H), 3.99 (d, *J* = 4.4 Hz, 1H), 3.94-3.54 (m, 18H), 3.33 (q, *J* = 8.8 Hz, 2H), 3.18 (q, *J* = 6.4 Hz, 2H), 3.01 (dd, *J* = 4.8, 12.8 Hz, 1H), 2.79 (d, *J* =

12.8 Hz, 1H), 2.72 (dd,  $J = 5.2, 12.8$  Hz, 1H), 2.26 (t,  $J = 7.2$  Hz, 2H), 2.04 (s, 3H), 1.75 (t,  $J = 12.8$  Hz, 1H), 1.67-1.61 (m, 4H), 1.54 (t,  $J = 6.8$  Hz, 2H), 1.42-1.38 (m, 6H).  $^{13}\text{C}$  NMR (100 MHz,  $\text{D}_2\text{O}$ ):  $\delta$  176.58, 174.93, 173.48, 165.32, 103.24, 101.94, 100.31, 79.70, 74.74, 74.65, 73.71, 72.78, 72.55, 72.39, 71.80, 70.81, 70.54, 68.53, 68.40, 63.55, 62.67, 62.10, 62.02, 60.34, 60.26, 59.35, 55.42, 51.82, 40.12, 39.73, 39.24, 35.92, 35.55, 28.67, 28.24, 28.12, 27.86, 27.70, 25.83. HRMS (ESI) calcd for  $\text{C}_{39}\text{H}_{65}\text{N}_4\text{O}_{21}\text{S}$   $[\text{M}-\text{H}]^-$   $m/z$  957.3867; found: 957.3862.

**Compound 2.** A solution of aminocaproic acid (20 mmol) in DMF (30 mL) was added 3-(triethoxysilyl)propyl isocyanate (10 mmol) dropwise under nitrogen. The solution was stirred at rt for 3 h. The mixture was concentrated to dryness *in vacuo* and then diluted with ethyl acetate. The organic layer was washed by  $\text{H}_2\text{O}$  for three times and was dried over  $\text{MgSO}_4$ , filtered, and concentrated. The crude product was then dissolved in DMF (30 mL) followed by adding EDC (15 mmol) and *N*-hydroxysuccinimide (15 mmol). The solution was stirred at rt for 3 h. The mixture was concentrated to dryness *in vacuo* and then diluted with ethyl acetate. The organic layer was washed by  $\text{H}_2\text{O}$  for three times. The organic layer was dried over  $\text{MgSO}_4$ , filtered, and concentrated. The residue was purified by column chromatography on silica gel (MeOH/DCM 1:5) to give **2** (2.53 g, 52% for 2 steps).  $^1\text{H}$  NMR (400 MHz,  $\text{CDCl}_3$ ):  $\delta$  3.79 (q,  $J = 7.2$  Hz, 6H), 3.17 (t,  $J = 6.4$  Hz, 2H), 3.12 (t,  $J = 6.4$  Hz, 2H), 2.83 (s,

4H), 2.60 (t,  $J = 6.4$  Hz, 2H), 1.75 (p,  $J = 7.2$  Hz, 2H), 1.60 (q,  $J = 7.2$  Hz, 2H), 1.50 (q,  $J = 7.2$  Hz, 2H), 1.44 (m, 2H), 1.19 (t,  $J = 7.2$  Hz, 9H), 0.60 (dd,  $J = 8.0, 8.0$  Hz, 2H).  $^{13}\text{C}$  NMR (100 MHz,  $\text{CDCl}_3$ ):  $\delta$  169.32 (x2), 168.28, 158.58, 58.07 (x3), 42.51, 39.39, 30.53, 29.24, 25.47, 25.31 (x2), 23.91, 23.38, 17.98 (x3), 7.30. HRMS (ESI) calcd for  $\text{C}_{20}\text{H}_{37}\text{N}_3\text{O}_8\text{Na}$   $[\text{M}+\text{Na}]^+$   $m/z$  498.2254; found: 498.2248.

**Compound 4.** A solution of 3-(3-methyl-3H-diaziren-3-yl)propanoic acid<sup>1</sup> (0.5 mmol) in DCM (3 mL) was preactivated with EDC (0.75 mmol), HOBt (0.75 mmol), and trimethylamine (1 mmol) under nitrogen for 30 min. *N*-Boc-1,6-diaminohexane (0.6 mmol) in DCM (3 mL) was then added to the above solution and the resulting solution was stirred at rt for 12 h. The mixture was concentrated to dryness *in vacuo* and then diluted with ethyl acetate. The organic layer was washed with  $\text{H}_2\text{O}$  for three times and was dried over  $\text{MgSO}_4$ , filtered, and concentrated. The crude product was purified by column chromatography on silica gel (MeOH/DCM 1:5). TFA (0.2 mL) was added to a solution of above compound (0.2 mmol) in DCM (1.8 mL) at 0 °C under nitrogen and the resulting solution was stirred at rt for 1 h. The solution was removed and dried *in vacuo* to yield **4** (33 mg, 79% for 2 steps).  $^1\text{H}$  NMR (400 MHz,  $\text{CD}_3\text{OD}$ ):  $\delta$  3.17 (t,  $J = 6.8$  Hz, 2H), 2.91 (t,  $J = 8.0$  Hz, 2H) 2.07 (t,  $J = 8.0$  Hz, 2H), 1.67 (m, 4H), 1.53 (t,  $J = 6.8$  Hz, 2H), 1.40 (t,  $J = 4.0$  Hz, 4H), 1.00 (s, 3H).  $^{13}\text{C}$  NMR (100 MHz,  $\text{CD}_3\text{OD}$ ):  $\delta$  174.68, 40.85, 40.32, 31.70, 31.54, 30.25, 28.65, 27.48, 27.18, 26.51, 19.90. HRMS

(ESI) calcd for  $C_{11}H_{23}N_4O$   $[M+H]^+$   $m/z$  227.1872; found: 227.1870.

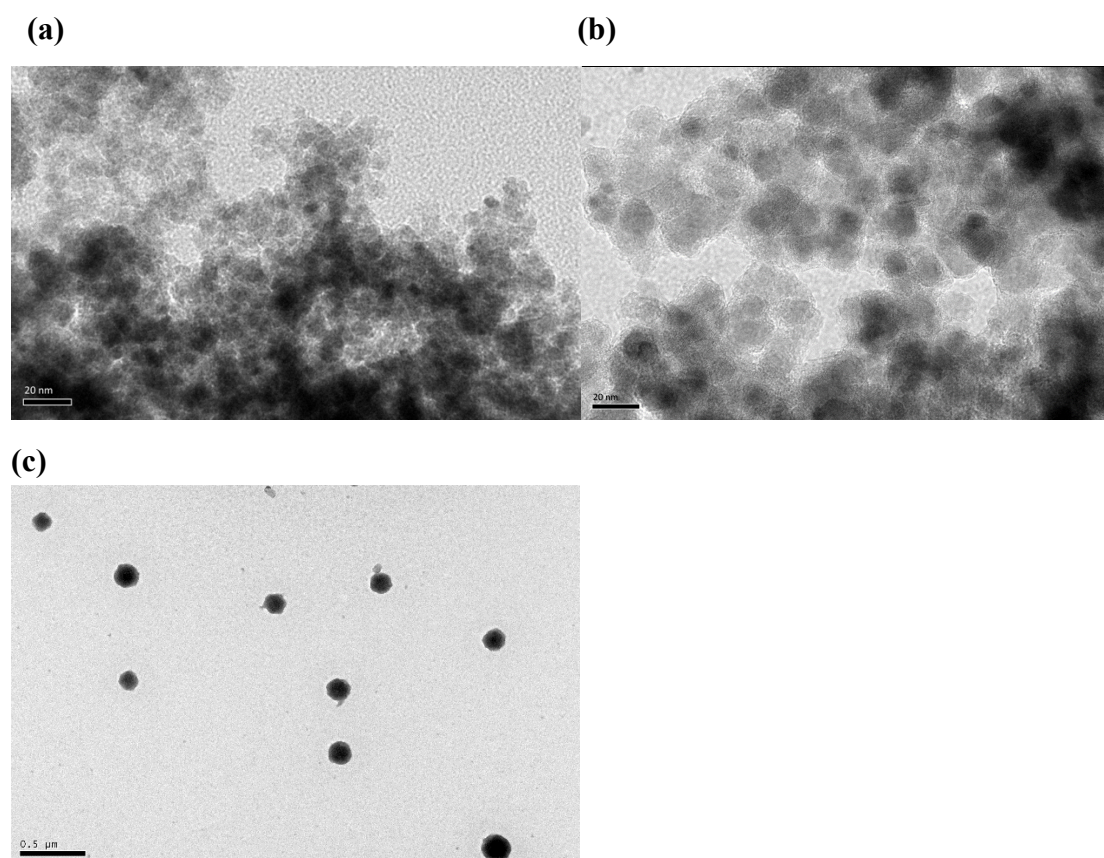

**Figure S1.** Characterization of MNPs. TEM images of (a) magnetic core  $Fe_3O_4$ , (b) BA-Diaz@MNPs C, and (c) Siglec-2-BA-Diaz@MNP C. The scale bars in TEM images of (a), (b), and (c) are 20, 20, and 500 nm, respectively.

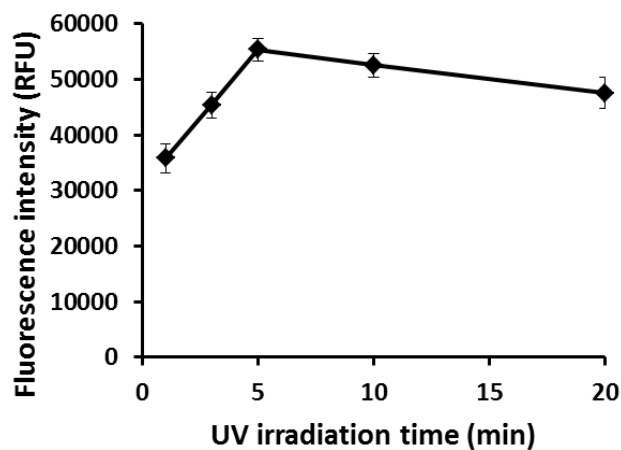

**Figure S2.** Effect of UV irradiation time on the immobilization of Siglec-2-Fc on BA-Diaz@MNPs. C. Siglec-2-Fc (50  $\mu\text{g/mL}$ ) was incubated on BA-Diaz@MNP C followed by UV irradiation for 1, 3, 5, 10 and 20 min, respectively. The fluorescence signals were measured after incubated with biotinylated sialoside **1** and Streptavidin-Cy3 followed by treatment with GdnHCl.

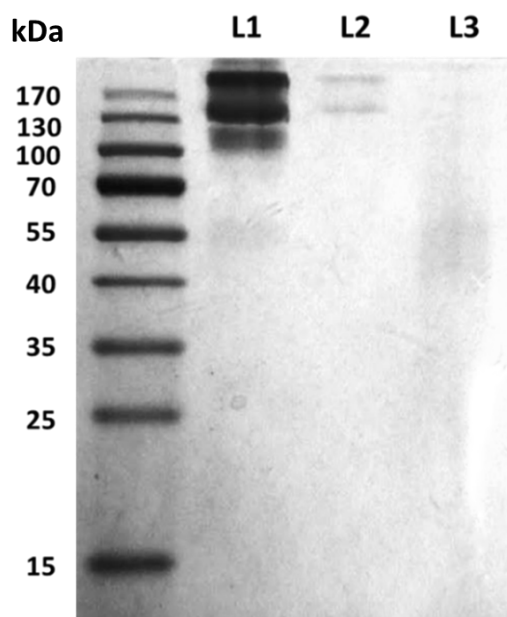

**Figure S3.** Non-reducing SDS-PAGE gel analysis of the Siglec-2-Fc@MNPs prepared by BA-Diaz-based fabrication strategy showing either traces or no detectable noncovalently attached Siglec-2-Fc on the BA-Diaz@MNP C. L1: Siglec-2-Fc (5  $\mu\text{g}$ ); L2: Siglec-2-Fc (2  $\mu\text{g}$ ) immobilized on BA@MNPs A shows partially release of Siglec-2-Fc from MNPs; L3: Siglec-2-Fc (2  $\mu\text{g}$ ) immobilized on BA-Diaz@MNP C. Protein ladder is shown in left.



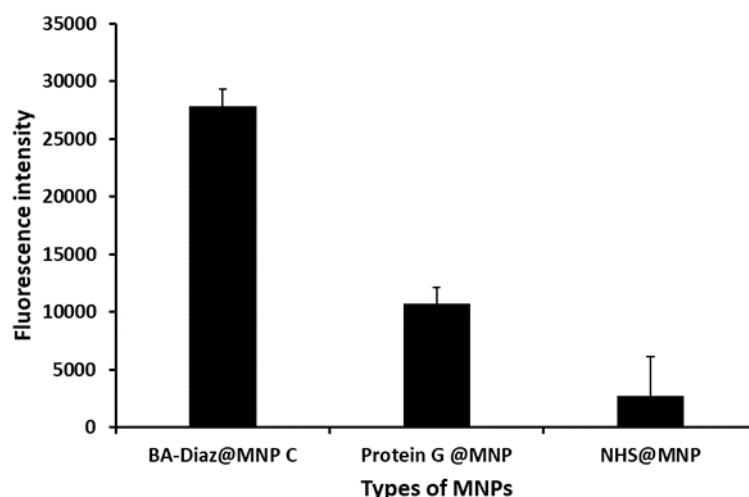

**Figure S4.** Comparison of relative binding activity of Siglec-2-Fc immobilized on MNPs through oriented and irreversible conjugation utilizing BA-Diaz@MNP C, Protein G@MNP, and NHS@MNP. In each case, the same amount of Siglec-2-Fc (50  $\mu\text{g/mL}$ ) was used to be immobilized on the same weight of MNPs. Siglec-2-Fc@MNP complexes obtained from different methods were incubated first with biotinylated sialoside **1** and then Streptavidin-Cy3 followed by treatment with GdnHCl. The fluorescence signal of the supernatants were measured.

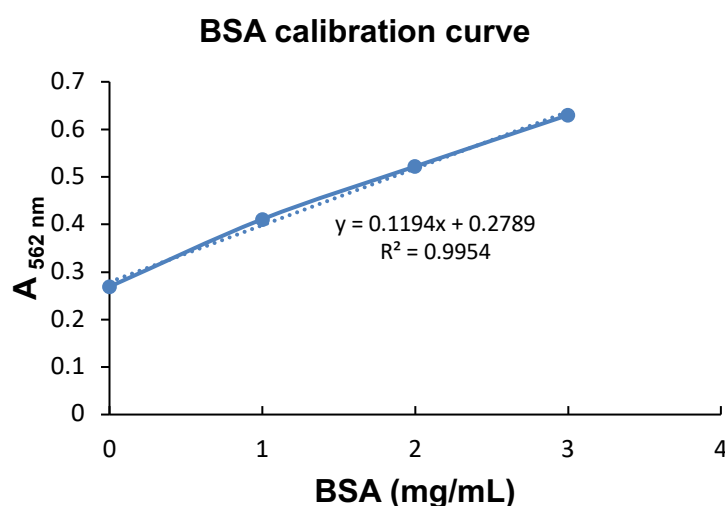

**Figure S5.** Standard curve of BSA quantified by BCA assay. The linear calibration curve of protein was observed at 562 nm. To quantify the protein amount on MNP, BSA

standard protein and the anti-SAA mAb@MNP samples were prepared and reacted with BCA reagents at 60°C for 30 min. The quantification curve was obtained by various amount of BSA (0-3 µg/µL). The MNPs were separated by a magnet and the supernatant was used for measurement of absorbance at 562 nm.

### **Liquid Chromatography-Tandem Mass Spectrometry (LC-MS/MS) Analysis**

**LC-MS/MS Method.** Enriched glycopeptides from BA-Diaz@MNPs and randomly conjugated Siglec-2 MNPs (R@MNPs and R120A@MNPs) were analyzed on a nanoACQUITY UPLC system (Waters, Milford, MA) coupled with a Synapt G1 Q-ToF mass spectrometer (Waters) with a nanospray ion source. The LC mobile phase system consists of water with 0.1% formic acid (buffer A) and acetonitrile with 0.1% formic acid (buffer B). The peptides were eluted with a gradient of 0-80% buffer B (0.1% FA in ACN) for 120 min, operated in ESI-positive V mode. Data acquisition was done by data-dependent acquisition mode to automatically switch between a full MS scan (400-1600 m/z, 0.6 s.) and six MS/MS scans (100-1990 m/z, 0.6 s. for each scan) on the six most intense ions present. For comparison of enrichment efficiency of Siglec-2-BA-Diaz@MNP C and Siglec-2-BA-Diaz-DSS@MNP, LC-MS/MS analysis of MNP-enriched glycopeptides was performed on linear trap quadrupole (LTQ)-Orbitrap Velos (Thermo Fisher Scientific, Bremen, Germany) coupled to a nanoACQUITY UPLC System (Waters) through a nanospray interface (Proxeon, Odense, Denmark). The deglycosylated peptides were separated using a segmented gradient for 150-min segmented gradient with the following mobile phases: water with 0.1% formic acid (buffer A) and 2% to 80% acetonitrile with 0.1% formic acid (buffer B) at 500 nL/min flow rate. The electrospray voltage was 1.8 kV, and the ion transfer tube temperature was 300°C. Collision-induced dissociation (CID) mode using a top20 method was used,

and full MS scans were acquired in the Orbitrap mass analyzer over the  $m/z$  350–1600 range with resolution 60,000 ( $m/z$  400). The target value was 5.00E+05. The twenty-most intense peaks with charge state 2 to 4 were selected for sequencing and fragmented in the ion trap with normalized collision energy of 35%, activation  $q = 0.25$ , activation time of 10 ms, and one microscan. The exclusion duration is 60 sec. The target value was 2000 and the isolation width is 2 Da. The maximum allowed ion accumulation times was 500 ms for full scans and 100 ms for CID.

**Protein Identification.** The raw data were processed using Proteome Discoverer 2.1 (PD2.1; ThermoFisher Scientific) and peptide identification was performed by Mascot search engine (version 2.3.2) and SEQUEST search engine against the Swiss-Prot database (v2015\_12, total 20193 sequences from human). Percolator (strict false discovery rate (FDR) of 0.01 and a relaxed FDR of 0.05) was set and the mass tolerance for precursor ion mass was 10 ppm with the fragment ion tolerance as 0.1 Da. The following parameters were used: protease specified as trypsin, maximum missed cleavage set to two, variable modifications selected were methionine oxidation, cysteine alkylation by iodoacetamide (carbamidomethyl), and deamidation at asparagine or glutamine. Peptides were considered identified if their individual ion score was higher than the identity score ( $p < 0.05$ ). A decoy database search against a randomized decoy database created by PD2.1 was performed to evaluate the FDR ( $< 1\%$ ) in protein identification. Peptide-spectrum matches (PSMs) with at least high confidence and a strict maximum parsimony principle (target FDR  $< 0.01$ ) were applied for the protein level. Precursor Ions Area Detector node was used to extract the ion chromatogram for label-free quantitation. The peak area (i.e., area under the curve) of each precursor ion was obtained and the abundance of identified protein was calculated from the top three of all unique and razor peptides in Peptide and Protein Quantifier

node.

**Identified glycoproteins enriched by Siglec-2-BA-Diaz@MNP C and Siglec-2-BA-Diaz-DSS@MNP.** The enriched proteins, obtained from single biological replicate, were analyzed by the above methods. Using label-free quantification to compare the enriched glycoproteins, 36 proteins showed higher than 5-fold abundance in Siglec-2-BA-Diaz@MNP C in comparison with Siglec-2-BA-Diaz-DSS@MNP. The specificities of the materials, calculated as the ratio of glycoproteins over total proteins identified, are 20% and 24% for BA-Diaz@MNP C and BA-Diaz-DSS@MNP, respectively. The proteins commonly found from both MNP enrichments were then further analyzed by STRING database to create the CD-22 (Siglec-2) interacting network. For the protein signaling network analysis, the glycoproteins were analyzed using STRING version 11 (<http://string-db.org/>). Multiple protein names were inputted into String, the organism was set as Homo sapiens, and prediction methods included the following: neighborhood, gene fusion, cooccurrence, coexpression, experiments, databases, textmining and homology. Median confidence (0.4) was used, shown interactors was set as “custom limit=0”, and the additional (white) nodes was set as 0. A signaling network composed of predicted or known protein interactions was then obtained and Cytoscape was used to redraw the protein network to show only CD-22 interacting proteins and secondary interactions (interactions with CD-22 interacting proteins).

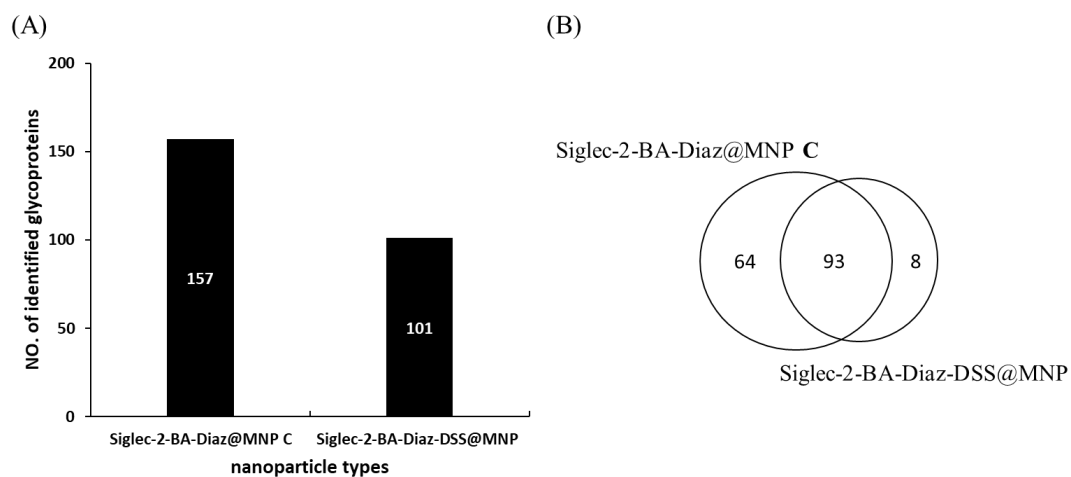

**Figure S6.** Glycoproteins and peptides identification were analyzed by Thermo LTQ Orbitrap Velos. (a) Identified glycoproteins from Siglec-2-BA-Diaz@MNP C and Siglec-2-BA-Diaz-DSS@MNP. (b) Overlap of identified glycoproteins from the two MNPs.

**Table S1.** Proteins identified with BA-Diaz@MNP enrichment on BJAB cells.

| Acc. No. | Gene          | Description                                                                  | Score  | #        | emP   | Iden-  |
|----------|---------------|------------------------------------------------------------------------------|--------|----------|-------|--------|
|          |               |                                                                              | Mascot | Unique   | AI    | tified |
|          |               |                                                                              |        | Peptides |       | in Ref |
| P20273   | CD22 *        | B-cell receptor CD22                                                         | 1778   | 29       | 15.24 | v      |
| P01903   | HLA-DRA*      | HLA class II histocompatibility antigen,<br>DR alpha chain                   | 645    | 11       | 25.83 | v      |
| P04233   | CD74          | HLA class II histocompatibility antigen<br>gamma chain                       | 589    | 4        | 0.97  |        |
| Q95IE3   | HLA-DRB1*     | HLA class II histocompatibility antigen,<br>DRB1-12 beta chain               | 513    | 5        | 12.34 | v      |
| Q30134   | HLA-DRB1      | HLA class II histocompatibility antigen,<br>DRB1-8 beta chain                | 480    | 1        | 5.49  |        |
| Q5Y7A7   | HLA-DRB1      | HLA class II histocompatibility antigen,<br>DRB1-13 beta chain               | 466    | 3        | 14.40 |        |
| P01860   | IGHG3         | Immunoglobulin heavy constant gamma 3                                        | 437    | 1        | 4.28  |        |
| P25705   | ATP5A1        | ATP synthase subunit alpha, mitochondrial                                    | 433    | 11       | 1.07  |        |
| P30461   | HLA-B*        | HLA class I histocompatibility antigen, B-<br>13 alpha chain                 | 346    | 3        | 1.24  | v      |
| P04843   | RPN1          | Dolichyl-diphosphooligosaccharide--<br>protein glycosyltransferase subunit 1 | 325    | 11       | 1.08  |        |
| P79483   | HLA-DRB3      | HLA class II histocompatibility antigen,<br>DR beta 3 chain                  | 323    | 2        | 1.96  |        |
| P08195   | SLC3A2*       | 4F2 cell-surface antigen heavy chain                                         | 305    | 11       | 1.41  | v      |
| P04440   | HLA-DPB1*     | HLA class II histocompatibility antigen,<br>DP beta 1 chain                  | 274    | 2        | 0.93  | v      |
| Q9GIY3   | HLA-DRB1*     | HLA class II histocompatibility antigen,<br>DRB1-14 beta chain               | 258    | 1        | 9.00  | v      |
| P35613   | BSG           | Basigin OS=Homo sapiens                                                      | 229    | 4        | 0.59  |        |
| P05107   | ITGB2*        | Integrin beta-2                                                              | 209    | 13       | 1.02  | v      |
| P08575   | PTPRC*        | Receptor-type tyrosine-protein<br>phosphatase C                              | 195    | 9        | 0.33  | v      |
| P17693   | HLA-G         | HLA class I histocompatibility antigen,<br>alpha chain G                     | 167    | 1        | 0.39  |        |
| P04844   | RPN2          | Dolichyl-diphosphooligosaccharide--<br>protein glycosyltransferase subunit 2 | 157    | 4        | 0.35  |        |
| O00754   | MAN2B1        | Lysosomal alpha-mannosidase                                                  | 133    | 3        | 0.12  |        |
| P02748   | C9            | Complement component C9                                                      | 131    | 2        | 0.16  |        |
| P14625   | HSP90B1       | Endoplasmic OS=Homo sapiens                                                  | 130    | 4        | 0.25  |        |
| P01920   | HLA-<br>DQB1* | HLA class II histocompatibility antigen,<br>DQ beta 1 chain                  | 123    | 7        | 2.16  | v      |
| P49755   | TMED10        | Transmembrane emp24 domain-containing<br>protein 10                          | 108    | 3        | 0.70  |        |

|        |          |                                                                      |     |   |      |   |
|--------|----------|----------------------------------------------------------------------|-----|---|------|---|
| P08238 | HSP90AB1 | Heat shock protein HSP 90-beta                                       | 108 | 6 | 0.46 |   |
| P02042 | HBD      | Hemoglobin subunit delta                                             | 106 | 1 | 0.23 |   |
| Q12907 | LMAN2    | Vesicular integral-membrane protein<br>VIP36                         | 94  | 7 | 1.68 |   |
| Q13724 | MOGS     | Mannosyl-oligosaccharide glucosidase                                 | 77  | 3 | 0.23 |   |
| P01909 | HLA-DQA1 | HLA class II histocompatibility antigen,<br>DQ alpha 1 chain         | 73  | 4 | 1.31 |   |
| P13473 | LAMP2    | Lysosome-associated membrane<br>glycoprotein 2                       | 70  | 2 | 0.23 |   |
| Q9NR96 | TLR9     | Toll-like receptor 9                                                 | 66  | 2 | 0.08 |   |
| P23284 | PPIB     | Peptidyl-prolyl cis-trans isomerase B                                | 63  | 1 | 0.16 |   |
| Q14165 | MLEC     | Malectin                                                             | 61  | 1 | 0.12 |   |
| P02786 | TFRC*    | Transferrin receptor protein 1                                       | 58  | 6 | 0.31 | v |
| P13987 | CD59     | CD59 glycoprotein                                                    | 55  | 1 | 0.39 |   |
| P54709 | ATP1B3   | Sodium/potassium-transporting ATPase<br>subunit beta-3               | 54  | 3 | 1.15 |   |
| P15153 | RAC2     | Ras-related C3 botulinum toxin substrate 2                           | 48  | 3 | 1.00 |   |
| P69905 | HBA1     | Hemoglobin subunit alpha                                             | 45  | 3 | 2.16 |   |
| Q6NUQ4 | TMEM214  | Transmembrane protein 214                                            | 42  | 2 | 0.13 |   |
| P11166 | SLC2A1   | Solute carrier family 2, facilitated glucose<br>transporter member 1 | 37  | 1 | 0.15 |   |
| P43307 | SSR1     | Translocon-associated protein subunit<br>alpha                       | 37  | 2 | 0.47 |   |
| Q08380 | LGALS3BP | Galectin-3-binding protein                                           | 37  | 4 | 0.32 |   |
| P28288 | ABCD3    | ATP-binding cassette sub-family D<br>member 3                        | 35  | 2 | 0.11 |   |
| Q13586 | STIM1    | Stromal interaction molecule 1                                       | 35  | 3 | 0.20 |   |
| P42081 | CD86     | T-lymphocyte activation antigen CD86                                 | 34  | 1 | 0.15 |   |
| P43308 | SSR2     | Translocon-associated protein subunit beta                           | 33  | 2 | 1.15 |   |
| Q96KA5 | CLPTM1L  | Cleft lip and palate transmembrane protein<br>1-like protein         | 32  | 2 | 0.39 |   |
| P27797 | CALR     | Calreticulin                                                         | 32  | 3 | 0.30 |   |
| P40926 | MDH2     | Malate dehydrogenase, mitochondrial                                  | 32  | 4 | 0.45 |   |
| Q92896 | GLG1     | Golgi apparatus protein 1                                            | 27  | 2 | 0.07 |   |
| P08134 | RHOC     | Rho-related GTP-binding protein RhoC                                 | 27  | 2 | 0.52 |   |
| P20645 | M6PR     | Cation-dependent mannose-6-phosphate<br>receptor                     | 17  | 1 | 0.13 |   |
| P62937 | PPIA     | Peptidyl-prolyl cis-trans isomerase A                                | 0   | 4 | 0.93 |   |

|        |         |                                                    |   |   |      |   |
|--------|---------|----------------------------------------------------|---|---|------|---|
| P06576 | ATP5B   | ATP synthase subunit beta, mitochondrial           | 0 | 9 | 0.95 |   |
| P60953 | CDC42   | Cell division control protein 42 homolog           | 0 | 2 | 1.00 |   |
| P32970 | CD70    | CD70 antigen                                       | 0 | 3 | 0.70 |   |
| P11049 | CD37*   | Leukocyte antigen CD37                             | 0 | 1 | 0.17 | v |
| P11717 | IGF2R   | Cation-independent mannose-6-phosphate<br>receptor | 0 | 3 | 0.05 |   |
| Q15758 | SLC1A5* | Neutral amino acid transporter B(0)                | 0 | 1 | 0.11 | v |

**Table S2.** Glycoproteins identified in BJAB cells from both Siglec-2-BA-Diaz@MNP C and Siglec-2-BA-Diaz-DSS@MNP enrichment.

| Accession | Gene     | Description                                                       | Mascot<br>Score | # unique<br>peptide | emPAI  | MW<br>[kDa] |
|-----------|----------|-------------------------------------------------------------------|-----------------|---------------------|--------|-------------|
| P01857    | IGHG1    | Immunoglobulin heavy<br>constant gamma 1                          | 12304           | 8                   | 397.11 | 36.08       |
| P20273    | CD22     | B-cell receptor CD22                                              | 11589           | 24                  | 20.98  | 95.29       |
| P01903    | HLA-DRA  | HLA class II<br>histocompatibility antigen, DR<br>alpha chain     | 10884           | 9                   | 116.88 | 28.59       |
| Q5Y7A7    | HLA-DRB1 | HLA class II<br>histocompatibility antigen,<br>DRB1-13 beta chain | 6528            | 2                   | 63.94  | 29.99       |
| Q95IE3    | HLA-DRB1 | HLA class II<br>histocompatibility antigen,<br>DRB1-12 beta chain | 6371            | 2                   | 55.23  | 29.86       |
| P20039    | HLA-DRB1 | HLA class II<br>histocompatibility antigen,<br>DRB1-11 beta chain | 5652            | 1                   | 41.17  | 30.14       |
| Q30134    | HLA-DRB1 | HLA class II<br>histocompatibility antigen,<br>DRB1-8 beta chain  | 5509            | 1                   | 26.38  | 29.99       |
| Q9GIY3    | HLA-DRB1 | HLA class II<br>histocompatibility antigen,<br>DRB1-14 beta chain | 4729            | 1                   | 14.85  | 30.12       |
| P79483    | HLA-DRB3 | HLA class II<br>histocompatibility antigen, DR<br>beta 3 chain    | 4632            | 4                   | 28.55  | 29.94       |



|        |          |                                                                 |      |    |       |       |
|--------|----------|-----------------------------------------------------------------|------|----|-------|-------|
| P04233 | CD74     | HLA class II<br>histocompatibility antigen<br>gamma chain       | 4420 | 10 | 86.33 | 33.49 |
| P35613 | BSG      | Basigin                                                         | 4287 | 10 | 6.94  | 42.17 |
| P25705 | ATP5A1   | ATP synthase subunit alpha,<br>mitochondrial                    | 4119 | 17 | 2.79  | 59.71 |
| P05107 | ITGB2    | Integrin beta-2                                                 | 4088 | 29 | 4.18  | 84.73 |
| P08195 | SLC3A2   | 4F2 cell-surface antigen heavy<br>chain                         | 3147 | 18 | 3.15  | 67.95 |
| P10316 | HLA-A    | HLA class I histocompatibility<br>antigen, A-69 alpha chain     | 3081 | 7  | 11.22 | 40.95 |
| P06576 | ATP5B P  | ATP synthase subunit beta,<br>mitochondrial                     | 3079 | 21 | 10.60 | 56.53 |
| Q08380 | LGALS3BP | Galectin-3-binding protein                                      | 2932 | 17 | 3.98  | 65.29 |
| P01920 | HLA-DQB1 | HLA class II<br>histocompatibility antigen, DQ<br>beta 1 chain  | 2441 | 10 | 12.90 | 29.97 |
| P10319 | HLA-B    | HLA class I histocompatibility<br>antigen, B-58 alpha chain     | 2415 | 1  | 3.47  | 40.31 |
| P30443 | HLA-A    | HLA class I histocompatibility<br>antigen, A-1 alpha chain      | 2097 | 4  | 5.70  | 40.82 |
| Q13740 | ALCAM    | CD166 antigen                                                   | 1842 | 12 | 2.16  | 65.06 |
| P30504 | HLA-C    | HLA class I histocompatibility<br>antigen, Cw-4 alpha chain     | 1829 | 1  | 2.79  | 40.97 |
| P15391 | CD19     | B-lymphocyte antigen CD19                                       | 1567 | 8  | 1.22  | 61.09 |
| P20036 | HLA-DPA1 | HLA class II<br>histocompatibility antigen, DP<br>alpha 1 chain | 1414 | 5  | 10.94 | 29.36 |
| P07602 | PSAP     | Prosaposin                                                      | 1347 | 8  | 1.11  | 58.07 |
| Q13586 | STIM1    | Stromal interaction molecule 1                                  | 1322 | 15 | 2.57  | 77.38 |
| P05556 | ITGB1    | Integrin beta-1                                                 | 1305 | 12 | 1.75  | 88.36 |
| P13473 | LAMP2    | Lysosome-associated<br>membrane glycoprotein 2                  | 1239 | 6  | 1.31  | 44.93 |
| P04440 | HLA-DPB1 | HLA class II<br>histocompatibility antigen, DP<br>beta 1 chain  | 1195 | 5  | 2.73  | 29.14 |
| Q9BVK6 | TMED9    | Transmembrane emp24<br>domain-containing protein 9              | 1171 | 7  | 4.62  | 27.26 |

|        |          |                                                                          |      |    |       |        |
|--------|----------|--------------------------------------------------------------------------|------|----|-------|--------|
| P08575 | PTPRC    | Receptor-type tyrosine-protein phosphatase C                             | 1134 | 18 | 0.94  | 147.16 |
| P25942 | CD40     | Tumor necrosis factor receptor superfamily member 5                      | 1093 | 8  | 7.48  | 30.60  |
| P43307 | SSR1     | Translocon-associated protein subunit alpha                              | 1077 | 4  | 3.64  | 32.22  |
| P08238 | HSP90AB1 | Heat shock protein HSP 90-beta                                           | 1071 | 10 | 2.08  | 83.21  |
| P02786 | TFRC     | Transferrin receptor protein 1                                           | 1021 | 9  | 0.50  | 84.82  |
| P49755 | TMED10   | Transmembrane emp24 domain-containing protein 10                         | 1014 | 4  | 1.89  | 24.96  |
| P04222 | HLA-C    | HLA class I histocompatibility antigen, Cw-3 alpha chain                 | 948  | 1  | 2.36  | 40.84  |
| P60953 | CDC42    | Cell division control protein 42 homolog                                 | 890  | 5  | 2.98  | 21.25  |
| Q92542 | NCSTN    | Nicastrin                                                                | 833  | 5  | 1.02  | 78.36  |
| P32942 | ICAM3    | Intercellular adhesion molecule 3                                        | 809  | 6  | 0.61  | 59.50  |
| O00461 | GOLIM4   | Golgi integral membrane protein 4                                        | 780  | 12 | 1.15  | 81.83  |
| P04843 | RPN1     | Dolichyl-diphosphooligosaccharide--protein glycosyltransferase subunit 1 | 769  | 15 | 1.46  | 68.53  |
| P13987 | CD59     | CD59 glycoprotein                                                        | 689  | 5  | 12.90 | 14.17  |
| Q86UP2 | KTN1     | Kinectin                                                                 | 685  | 18 | 0.66  | 156.18 |
| P13598 | ICAM2    | Intercellular adhesion molecule 2                                        | 675  | 4  | 0.90  | 30.64  |
| P05362 | ICAM1    | Intercellular adhesion molecule 1                                        | 673  | 7  | 0.71  | 57.79  |
| P14625 | HSP90B1  | Endoplasmin                                                              | 659  | 7  | 0.50  | 92.41  |
| P23284 | PPIB     | Peptidyl-prolyl cis-trans isomerase B                                    | 623  | 6  | 1.74  | 23.73  |
| Q92896 | GLG1     | Golgi apparatus protein 1                                                | 595  | 9  | 0.38  | 134.46 |
| P02748 | C9       | Complement component C9                                                  | 592  | 2  | 0.25  | 63.13  |
| P54709 | ATP1B3   | Sodium/potassium-transporting ATPase subunit beta-3                      | 554  | 6  | 1.93  | 31.49  |

|        |          |                                                                                        |     |   |      |       |
|--------|----------|----------------------------------------------------------------------------------------|-----|---|------|-------|
| P09326 | CD48     | CD48 antigen                                                                           | 540 | 5 | 1.42 | 27.67 |
| P62937 | PPIA     | Peptidyl-prolyl cis-trans<br>isomerase A                                               | 523 | 5 | 1.28 | 18.00 |
| P11279 | LAMP1    | Lysosome-associated<br>membrane glycoprotein 1                                         | 519 | 4 | 0.65 | 44.85 |
| O43493 | TGOLN2   | Trans-Golgi network integral<br>membrane protein 2                                     | 514 | 5 | 0.47 | 51.08 |
| P19440 | GGT1     | Gamma-<br>glutamyltranspeptidase 1                                                     | 509 | 3 | 0.33 | 61.37 |
| P20138 | CD33     | Myeloid cell surface antigen<br>CD33                                                   | 506 | 3 | 0.47 | 39.80 |
| Q12907 | LMAN2    | Vesicular integral-membrane<br>protein VIP36                                           | 504 | 9 | 3.16 | 40.20 |
| P05538 | HLA-DQB2 | HLA class II<br>histocompatibility antigen, DQ<br>beta 2 chain                         | 502 | 1 | 0.85 | 30.37 |
| Q70UQ0 | IKBIP    | Inhibitor of nuclear factor<br>kappa-B kinase-interacting<br>protein                   | 491 | 5 | 0.87 | 39.29 |
| P61586 | RHOA     | Transforming protein RhoA                                                              | 458 | 7 | 7.38 | 21.75 |
| Q9BY67 | CADM1    | Cell adhesion molecule 1                                                               | 448 | 3 | 0.47 | 48.48 |
| P27797 | CALR     | Calreticulin                                                                           | 430 | 9 | 2.46 | 48.11 |
| Q9BUR5 | APOO     | MICOS complex subunit<br>MIC26                                                         | 414 | 3 | 0.70 | 22.27 |
| Q96A33 | CCDC47   | Coiled-coil domain-containing<br>protein 47                                            | 412 | 6 | 1.02 | 55.84 |
| Q14165 | MLEC     | Malectin                                                                               | 410 | 3 | 0.59 | 32.21 |
| Q7Z7H5 | TMED4    | Transmembrane emp24<br>domain-containing protein 4                                     | 397 | 4 | 1.51 | 25.93 |
| Q09328 | MGAT5    | Alpha-1,6-<br>mannosylglycoprotein 6-beta-<br>N-<br>acetylglucosaminyltransferase<br>A | 386 | 1 | 0.06 | 84.49 |
| Q96EE4 | CCDC126  | Coiled-coil domain-containing<br>protein 126                                           | 385 | 1 | 0.29 | 15.66 |
| Q9Y3P8 | SIT1     | Signaling threshold-regulating<br>transmembrane adapter 1                              | 360 | 1 | 0.23 | 21.11 |

|        |          |                                                        |     |   |      |        |
|--------|----------|--------------------------------------------------------|-----|---|------|--------|
| P15153 | RAC2     | Ras-related C3 botulinum toxin substrate 2             | 347 | 3 | 2.16 | 21.42  |
| P02042 | HBD      | Hemoglobin subunit delta                               | 324 | 2 | 0.87 | 16.05  |
| P43121 | MCAM     | Cell surface glycoprotein MUC18                        | 312 | 3 | 0.28 | 71.56  |
| P69905 | HBA1     | Hemoglobin subunit alpha                               | 294 | 4 | 9.00 | 15.25  |
| P25445 | FAS      | Tumor necrosis factor receptor superfamily member 6    | 280 | 3 | 0.41 | 37.71  |
| P61009 | SPCS3    | Signal peptidase complex subunit 3                     | 268 | 3 | 1.37 | 20.30  |
| Q13291 | SLAMF1   | Signaling lymphocytic activation molecule              | 239 | 3 | 0.47 | 37.21  |
| P12259 | F5       | Coagulation factor V                                   | 186 | 3 | 0.07 | 251.55 |
| Q9HDC9 | APMAP    | Adipocyte plasma membrane-associated protein           | 182 | 5 | 0.59 | 46.45  |
| P02649 | APOE     | Apolipoprotein E                                       | 162 | 2 | 0.20 | 36.13  |
| P35443 | THBS4    | Thrombospondin-4                                       | 124 | 1 | 0.05 | 105.80 |
| P28068 | HLA-DMB  | HLA class II histocompatibility antigen, DM beta chain | 119 | 3 | 0.93 | 28.92  |
| Q96PC5 | MIA2     | Melanoma inhibitory activity protein 2                 | 95  | 3 | 0.08 | 159.74 |
| O75063 | FAM20B   | Glycosaminoglycan xylosylkinase                        | 84  | 1 | 0.30 | 46.40  |
| Q5UCC4 | EMC10    | ER membrane protein complex subunit 10                 | 63  | 2 | 0.43 | 27.33  |
| Q9Y639 | NPTN     | Neuroplastin                                           | 49  | 2 | 0.21 | 44.36  |
| Q96RQ9 | IL4I1    | L-amino-acid oxidase                                   | 36  | 2 | 0.22 | 62.84  |
| Q96DU3 | SLAMF6   | SLAM family member 6                                   | 23  | 1 | 0.12 | 37.32  |
| Q8WUT4 | LRRN4    | Leucine-rich repeat neuronal protein 4                 | 17  | 1 | 0.07 | 78.79  |
| Q96LC7 | SIGLEC10 | Sialic acid-binding Ig-like lectin 10                  | 0   | 1 | 0.14 | 76.54  |

---

**Table S3.** Glycoproteins identified in BJAB cells with  $\geq 5$  abundance in Siglec-2-BA-Diaz@MNP C than Siglec-2-BA-Diaz-DSS@MNP

| Acc. No. | Gene     | Description                                         | Mascot<br>Score | Unique<br>Pep-tides | emPAI  | Ratio: Siglec-2-<br>BA-Diaz@MNP<br>C / Siglec-2-BA-<br>Diaz-<br>DSS@MNP |
|----------|----------|-----------------------------------------------------|-----------------|---------------------|--------|-------------------------------------------------------------------------|
| P20273   | CD22     | B-cell receptor CD22                                | 11589           | 24                  | 20.98  | 6.25                                                                    |
|          |          |                                                     |                 |                     |        | 6.64                                                                    |
| P01903   | HLA-DRA  | HLA class II histocompatibility antigen             | 10884           | 9                   | 116.88 | 6.31                                                                    |
| P20039   | HLA-DRB1 | HLA class II histocompatibility antigen             | 5652            | 1                   | 41.17  | 7.37                                                                    |
| P08195   | SLC3A2   | 4F2 cell-surface antigen heavy chain                | 3147            | 18                  | 3.15   | 22.86                                                                   |
| P06576   | ATP5B    | ATP synthase subunit beta, mitochondrial            | 3079            | 21                  | 10.60  | 6.55                                                                    |
|          |          | HLA class I histocompatibility antigen, A-1 alpha   |                 |                     |        |                                                                         |
| P30443   | HLA-A    | chain                                               | 2097            | 4                   | 5.70   |                                                                         |
| P15391   | CD19     | B-lymphocyte antigen CD19                           | 1567            | 8                   | 1.22   | 5.00                                                                    |
|          |          | HLA class II histocompatibility antigen, DP alpha 1 |                 |                     |        | 6.00                                                                    |
| P20036   | HLA-DPA1 | chain                                               | 1414            | 5                   | 10.94  |                                                                         |
| Q13586   | STIM1    | Stromal interaction molecule 1                      | 1322            | 15                  | 2.57   | 10.77                                                                   |
|          |          |                                                     |                 |                     |        | 5.74                                                                    |
| P13473   | LAMP2    | Lysosome-associated membrane glycoprotein 2         | 1239            | 6                   | 1.31   | 8.25                                                                    |
|          |          | HLA class II histocompatibility antigen, DP beta 1  |                 |                     |        |                                                                         |
| P04440   | HLA-DPB1 | chain                                               | 1195            | 5                   | 2.73   | 10.89                                                                   |
| P08575   | PTPRC    | Receptor-type tyrosine-protein phosphatase C        | 1134            | 18                  | 0.94   | 12.94                                                                   |
| P08238   | HSP90AB1 | Heat shock protein HSP 90-beta                      | 1071            | 10                  | 2.08   |                                                                         |
| P02786   | TFRC     | Transferrin receptor protein 1                      | 1021            | 9                   | 0.50   | 5.57                                                                    |
|          |          | HLA class I histocompatibility antigen, Cw-3 alpha  |                 |                     |        | 6.86                                                                    |
| P04222   | HLA-C    | chain                                               | 948             | 1                   | 2.36   |                                                                         |
| Q92542   | NCSTN    | Nicastrin                                           | 833             | 5                   | 1.02   | 8.04                                                                    |
|          |          |                                                     |                 |                     |        | 9.00                                                                    |
|          |          | Dolichyl-diphosphooligosaccharide--protein          |                 |                     |        |                                                                         |
| P04843   | RPN1     | glycosyltransferase subunit 1                       | 769             | 15                  | 1.46   |                                                                         |
| Q86UP2   | KTN1     | Kinectin                                            | 685             | 18                  | 0.66   | 9.11                                                                    |

|        |          |                                                    |     |   |      |        |
|--------|----------|----------------------------------------------------|-----|---|------|--------|
| P14625 | HSP90B1  | Endoplasmin                                        | 659 | 7 | 0.50 | 7.74   |
| P02748 | C9       | Complement component C9                            | 592 | 2 | 0.25 | 13.00  |
|        |          | Sodium/potassium-transporting ATPase subunit       |     |   |      | 6.38   |
| P54709 | ATP1B3   | beta-3                                             | 554 | 6 | 1.93 |        |
| P09326 | CD48     | CD48 antigen                                       | 540 | 5 | 1.42 | 8.70   |
|        |          |                                                    |     |   |      | 5.29   |
| P62937 | PPIA     | Peptidyl-prolyl cis-trans isomerase A              | 523 | 5 | 1.28 |        |
| P19440 | GGT1     | Gamma-glutamyltranspeptidase 1                     | 509 | 3 | 0.33 | 5.64   |
|        |          | HLA class II histocompatibility antigen, DQ beta 2 |     |   |      | 5.11   |
| P05538 | HLA-DQB2 | chain                                              | 502 | 1 | 0.85 |        |
| P61586 | RHOA     | Transforming protein RhoA                          | 458 | 7 | 7.38 | 229.63 |
| Q9BY67 | CADM1    | Cell adhesion molecule 1                           | 448 | 3 | 0.47 | 7.06   |
| P27797 | CALR     | Calreticulin                                       | 430 | 9 | 2.46 | 20.00  |
| Q14165 | MLEC     | Malectin                                           | 410 | 3 | 0.59 | 17.14  |
| P69905 | HBA1     | Hemoglobin subunit alpha                           | 294 | 4 | 9.00 | 6.09   |
|        |          |                                                    |     |   |      | 6.59   |
| Q13291 | SLAMF1   | Signaling lymphocytic activation molecule          | 239 | 3 | 0.47 |        |
| P02649 | APOE     | Apolipoprotein E                                   | 162 | 2 | 0.20 | 5.67   |
|        |          | HLA class II histocompatibility antigen, DM beta   |     |   |      | 5.50   |
| P28068 | HLA-DMB  | chain                                              | 119 | 3 | 0.93 |        |
|        |          |                                                    |     |   |      | 5.00   |
| Q96PC5 | MIA2     | Melanoma inhibitory activity protein 2             | 95  | 3 | 0.08 |        |
| Q96DU3 | SLAMF6   | SLAM family member 6                               | 23  | 1 | 0.12 | 5.60   |
| Q96LC7 | SIGLEC10 | Sialic acid-binding Ig-like lectin 10              | 0   | 1 | 0.14 | 5.42   |

FCY-223-3

Current Data Parameters  
 NAME FCY-223-3  
 EXPNO 1  
 PROCNO 1  
 F2 - Acquisition Parameters  
 Date\_ 20151027  
 Time 18.50  
 INSTRUM spect  
 PULPROG zgpg30  
 PROCNO 5 mm DUL 100  
 PULPROG zgpg30  
 ID 32768  
 SOLVENT MeOD  
 NS 18  
 DS 0  
 SWH 640.256 Hz  
 FWHM 12.256 Hz  
 AQ 2.558940 sec  
 RG 228  
 DW 78.000 usec  
 DE 6.00 usec  
 TE 300.0 K  
 D1 2.00000000 sec  
 D11 1  
 D10 1  
 ===== CHANNEL f1 =====  
 NUC1 1H  
 P1 10.00 usec  
 PL1 -2.40 dB  
 SF01 400.1526010 MHz  
 F2 - Processing parameters  
 SI 16364  
 SF 400.1500068 MHz  
 MW 0 Hz  
 SSB 0 Hz  
 GB 0  
 PC 1.00

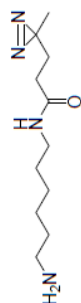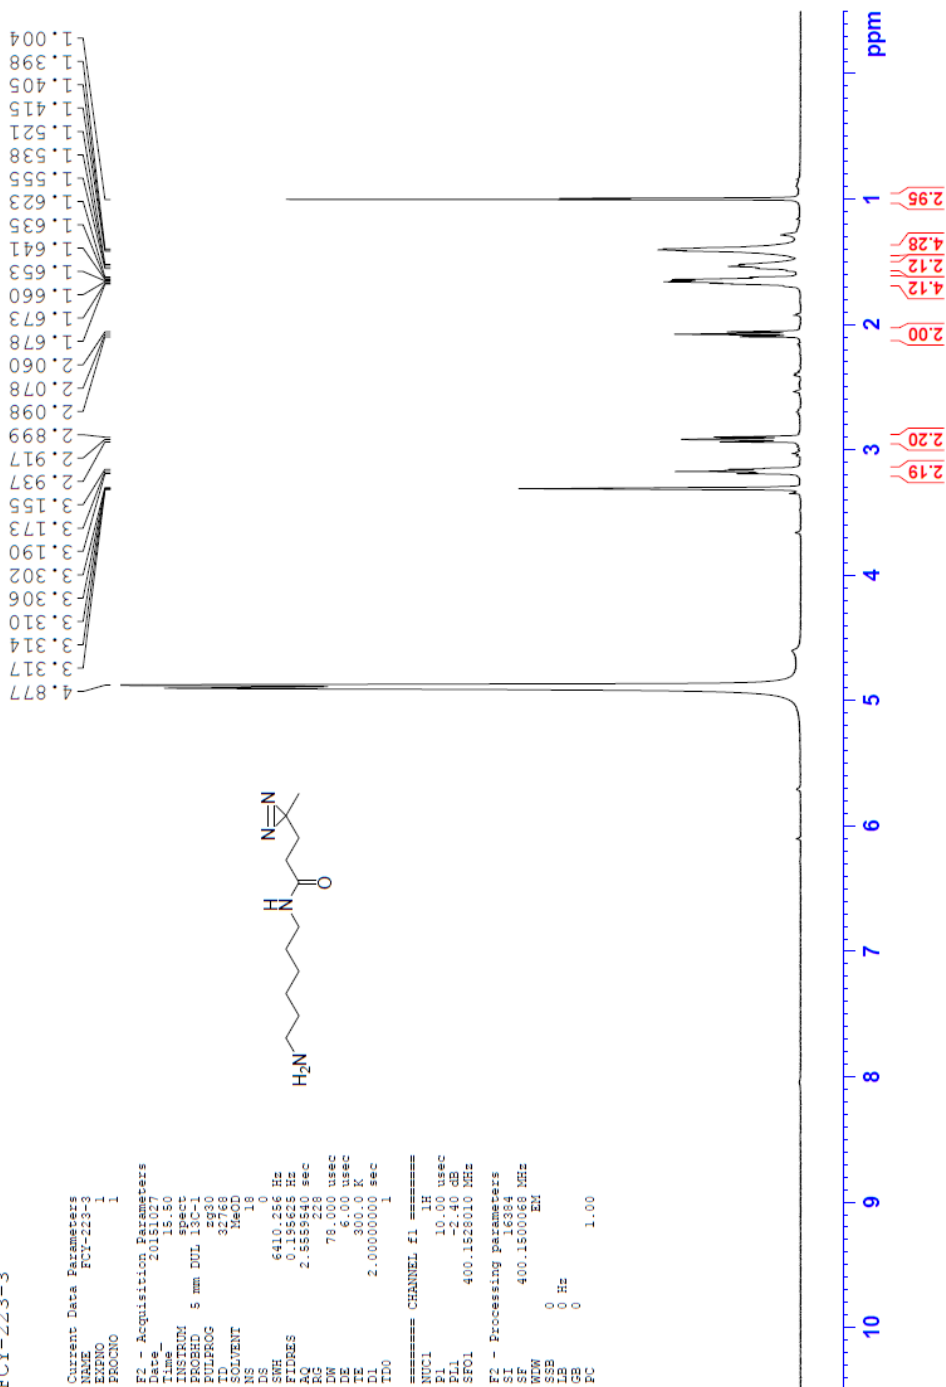

FCY-223-C

174.680

49.837  
49.624  
49.411  
49.198  
48.985  
48.772  
48.559  
40.849  
40.317  
31.696  
31.533  
30.246  
28.647  
27.479  
27.173  
26.504  
19.899

Current Data Parameters  
NAME FCY-223-C  
EXPNO 1  
PROCNO 1  
F2 - Acquisition Parameters  
Date\_ 20100505  
Time 9.48  
INSTRUM spect  
PROBHD 5 mm DUL 13C-1  
PULPROG zgpg30  
SOLVENT MeOD  
NS 341  
DS 2  
SWH 20720.0 Hz  
FIDRES 0.1620 Hz  
AQ 1.447520 sec  
RG 128  
DW 22.000 usec  
DE 3.00 usec  
TE 300.2 K  
D1 2.0000000 sec  
d11 0.0200000 sec  
DELTA 1.8888888 sec  
TD0 1  
===== CHANNEL f1 =====  
NUC1 13C  
P1 5.70 usec  
PL1 -2.00 dB  
SFO1 100.625000 MHz  
===== CHANNEL f2 =====  
PULPROG2 zgpg30  
SOLVENT2 water16  
NS 341  
DS 2  
SWH 20720.0 Hz  
FIDRES 0.1620 Hz  
AQ 1.447520 sec  
RG 128  
DW 22.000 usec  
DE 3.00 usec  
TE 300.2 K  
D1 2.0000000 sec  
d11 0.0200000 sec  
DELTA 1.8888888 sec  
TD0 1  
===== CHANNEL f3 =====  
NUC3 1H  
P3 1.00 usec  
PL3 0.00 dB  
SFO3 400.146000 MHz  
===== CHANNEL f4 =====  
NUC4 1H  
P4 1.00 usec  
PL4 0.00 dB  
SFO4 400.146000 MHz  
===== CHANNEL f5 =====  
NUC5 1H  
P5 1.00 usec  
PL5 0.00 dB  
SFO5 400.146000 MHz  
===== CHANNEL f6 =====  
NUC6 1H  
P6 1.00 usec  
PL6 0.00 dB  
SFO6 400.146000 MHz  
===== CHANNEL f7 =====  
NUC7 1H  
P7 1.00 usec  
PL7 0.00 dB  
SFO7 400.146000 MHz  
===== CHANNEL f8 =====  
NUC8 1H  
P8 1.00 usec  
PL8 0.00 dB  
SFO8 400.146000 MHz  
===== CHANNEL f9 =====  
NUC9 1H  
P9 1.00 usec  
PL9 0.00 dB  
SFO9 400.146000 MHz  
===== CHANNEL f10 =====  
NUC10 1H  
P10 1.00 usec  
PL10 0.00 dB  
SFO10 400.146000 MHz  
===== CHANNEL f11 =====  
NUC11 1H  
P11 1.00 usec  
PL11 0.00 dB  
SFO11 400.146000 MHz  
===== CHANNEL f12 =====  
NUC12 1H  
P12 1.00 usec  
PL12 0.00 dB  
SFO12 400.146000 MHz  
===== CHANNEL f13 =====  
NUC13 1H  
P13 1.00 usec  
PL13 0.00 dB  
SFO13 400.146000 MHz  
===== CHANNEL f14 =====  
NUC14 1H  
P14 1.00 usec  
PL14 0.00 dB  
SFO14 400.146000 MHz  
===== CHANNEL f15 =====  
NUC15 1H  
P15 1.00 usec  
PL15 0.00 dB  
SFO15 400.146000 MHz  
===== CHANNEL f16 =====  
NUC16 1H  
P16 1.00 usec  
PL16 0.00 dB  
SFO16 400.146000 MHz  
===== CHANNEL f17 =====  
NUC17 1H  
P17 1.00 usec  
PL17 0.00 dB  
SFO17 400.146000 MHz  
===== CHANNEL f18 =====  
NUC18 1H  
P18 1.00 usec  
PL18 0.00 dB  
SFO18 400.146000 MHz  
===== CHANNEL f19 =====  
NUC19 1H  
P19 1.00 usec  
PL19 0.00 dB  
SFO19 400.146000 MHz  
===== CHANNEL f20 =====  
NUC20 1H  
P20 1.00 usec  
PL20 0.00 dB  
SFO20 400.146000 MHz  
===== CHANNEL f21 =====  
NUC21 1H  
P21 1.00 usec  
PL21 0.00 dB  
SFO21 400.146000 MHz  
===== CHANNEL f22 =====  
NUC22 1H  
P22 1.00 usec  
PL22 0.00 dB  
SFO22 400.146000 MHz  
===== CHANNEL f23 =====  
NUC23 1H  
P23 1.00 usec  
PL23 0.00 dB  
SFO23 400.146000 MHz  
===== CHANNEL f24 =====  
NUC24 1H  
P24 1.00 usec  
PL24 0.00 dB  
SFO24 400.146000 MHz  
===== CHANNEL f25 =====  
NUC25 1H  
P25 1.00 usec  
PL25 0.00 dB  
SFO25 400.146000 MHz  
===== CHANNEL f26 =====  
NUC26 1H  
P26 1.00 usec  
PL26 0.00 dB  
SFO26 400.146000 MHz  
===== CHANNEL f27 =====  
NUC27 1H  
P27 1.00 usec  
PL27 0.00 dB  
SFO27 400.146000 MHz  
===== CHANNEL f28 =====  
NUC28 1H  
P28 1.00 usec  
PL28 0.00 dB  
SFO28 400.146000 MHz  
===== CHANNEL f29 =====  
NUC29 1H  
P29 1.00 usec  
PL29 0.00 dB  
SFO29 400.146000 MHz  
===== CHANNEL f30 =====  
NUC30 1H  
P30 1.00 usec  
PL30 0.00 dB  
SFO30 400.146000 MHz  
===== CHANNEL f31 =====  
NUC31 1H  
P31 1.00 usec  
PL31 0.00 dB  
SFO31 400.146000 MHz  
===== CHANNEL f32 =====  
NUC32 1H  
P32 1.00 usec  
PL32 0.00 dB  
SFO32 400.146000 MHz  
===== CHANNEL f33 =====  
NUC33 1H  
P33 1.00 usec  
PL33 0.00 dB  
SFO33 400.146000 MHz  
===== CHANNEL f34 =====  
NUC34 1H  
P34 1.00 usec  
PL34 0.00 dB  
SFO34 400.146000 MHz  
===== CHANNEL f35 =====  
NUC35 1H  
P35 1.00 usec  
PL35 0.00 dB  
SFO35 400.146000 MHz  
===== CHANNEL f36 =====  
NUC36 1H  
P36 1.00 usec  
PL36 0.00 dB  
SFO36 400.146000 MHz  
===== CHANNEL f37 =====  
NUC37 1H  
P37 1.00 usec  
PL37 0.00 dB  
SFO37 400.146000 MHz  
===== CHANNEL f38 =====  
NUC38 1H  
P38 1.00 usec  
PL38 0.00 dB  
SFO38 400.146000 MHz  
===== CHANNEL f39 =====  
NUC39 1H  
P39 1.00 usec  
PL39 0.00 dB  
SFO39 400.146000 MHz  
===== CHANNEL f40 =====  
NUC40 1H  
P40 1.00 usec  
PL40 0.00 dB  
SFO40 400.146000 MHz  
===== CHANNEL f41 =====  
NUC41 1H  
P41 1.00 usec  
PL41 0.00 dB  
SFO41 400.146000 MHz  
===== CHANNEL f42 =====  
NUC42 1H  
P42 1.00 usec  
PL42 0.00 dB  
SFO42 400.146000 MHz  
===== CHANNEL f43 =====  
NUC43 1H  
P43 1.00 usec  
PL43 0.00 dB  
SFO43 400.146000 MHz  
===== CHANNEL f44 =====  
NUC44 1H  
P44 1.00 usec  
PL44 0.00 dB  
SFO44 400.146000 MHz  
===== CHANNEL f45 =====  
NUC45 1H  
P45 1.00 usec  
PL45 0.00 dB  
SFO45 400.146000 MHz  
===== CHANNEL f46 =====  
NUC46 1H  
P46 1.00 usec  
PL46 0.00 dB  
SFO46 400.146000 MHz  
===== CHANNEL f47 =====  
NUC47 1H  
P47 1.00 usec  
PL47 0.00 dB  
SFO47 400.146000 MHz  
===== CHANNEL f48 =====  
NUC48 1H  
P48 1.00 usec  
PL48 0.00 dB  
SFO48 400.146000 MHz  
===== CHANNEL f49 =====  
NUC49 1H  
P49 1.00 usec  
PL49 0.00 dB  
SFO49 400.146000 MHz  
===== CHANNEL f50 =====  
NUC50 1H  
P50 1.00 usec  
PL50 0.00 dB  
SFO50 400.146000 MHz  
===== CHANNEL f51 =====  
NUC51 1H  
P51 1.00 usec  
PL51 0.00 dB  
SFO51 400.146000 MHz  
===== CHANNEL f52 =====  
NUC52 1H  
P52 1.00 usec  
PL52 0.00 dB  
SFO52 400.146000 MHz  
===== CHANNEL f53 =====  
NUC53 1H  
P53 1.00 usec  
PL53 0.00 dB  
SFO53 400.146000 MHz  
===== CHANNEL f54 =====  
NUC54 1H  
P54 1.00 usec  
PL54 0.00 dB  
SFO54 400.146000 MHz  
===== CHANNEL f55 =====  
NUC55 1H  
P55 1.00 usec  
PL55 0.00 dB  
SFO55 400.146000 MHz  
===== CHANNEL f56 =====  
NUC56 1H  
P56 1.00 usec  
PL56 0.00 dB  
SFO56 400.146000 MHz  
===== CHANNEL f57 =====  
NUC57 1H  
P57 1.00 usec  
PL57 0.00 dB  
SFO57 400.146000 MHz  
===== CHANNEL f58 =====  
NUC58 1H  
P58 1.00 usec  
PL58 0.00 dB  
SFO58 400.146000 MHz  
===== CHANNEL f59 =====  
NUC59 1H  
P59 1.00 usec  
PL59 0.00 dB  
SFO59 400.146000 MHz  
===== CHANNEL f60 =====  
NUC60 1H  
P60 1.00 usec  
PL60 0.00 dB  
SFO60 400.146000 MHz  
===== CHANNEL f61 =====  
NUC61 1H  
P61 1.00 usec  
PL61 0.00 dB  
SFO61 400.146000 MHz  
===== CHANNEL f62 =====  
NUC62 1H  
P62 1.00 usec  
PL62 0.00 dB  
SFO62 400.146000 MHz  
===== CHANNEL f63 =====  
NUC63 1H  
P63 1.00 usec  
PL63 0.00 dB  
SFO63 400.146000 MHz  
===== CHANNEL f64 =====  
NUC64 1H  
P64 1.00 usec  
PL64 0.00 dB  
SFO64 400.146000 MHz  
===== CHANNEL f65 =====  
NUC65 1H  
P65 1.00 usec  
PL65 0.00 dB  
SFO65 400.146000 MHz  
===== CHANNEL f66 =====  
NUC66 1H  
P66 1.00 usec  
PL66 0.00 dB  
SFO66 400.146000 MHz  
===== CHANNEL f67 =====  
NUC67 1H  
P67 1.00 usec  
PL67 0.00 dB  
SFO67 400.146000 MHz  
===== CHANNEL f68 =====  
NUC68 1H  
P68 1.00 usec  
PL68 0.00 dB  
SFO68 400.146000 MHz  
===== CHANNEL f69 =====  
NUC69 1H  
P69 1.00 usec  
PL69 0.00 dB  
SFO69 400.146000 MHz  
===== CHANNEL f70 =====  
NUC70 1H  
P70 1.00 usec  
PL70 0.00 dB  
SFO70 400.146000 MHz  
===== CHANNEL f71 =====  
NUC71 1H  
P71 1.00 usec  
PL71 0.00 dB  
SFO71 400.146000 MHz  
===== CHANNEL f72 =====  
NUC72 1H  
P72 1.00 usec  
PL72 0.00 dB  
SFO72 400.146000 MHz  
===== CHANNEL f73 =====  
NUC73 1H  
P73 1.00 usec  
PL73 0.00 dB  
SFO73 400.146000 MHz  
===== CHANNEL f74 =====  
NUC74 1H  
P74 1.00 usec  
PL74 0.00 dB  
SFO74 400.146000 MHz  
===== CHANNEL f75 =====  
NUC75 1H  
P75 1.00 usec  
PL75 0.00 dB  
SFO75 400.146000 MHz  
===== CHANNEL f76 =====  
NUC76 1H  
P76 1.00 usec  
PL76 0.00 dB  
SFO76 400.146000 MHz  
===== CHANNEL f77 =====  
NUC77 1H  
P77 1.00 usec  
PL77 0.00 dB  
SFO77 400.146000 MHz  
===== CHANNEL f78 =====  
NUC78 1H  
P78 1.00 usec  
PL78 0.00 dB  
SFO78 400.146000 MHz  
===== CHANNEL f79 =====  
NUC79 1H  
P79 1.00 usec  
PL79 0.00 dB  
SFO79 400.146000 MHz  
===== CHANNEL f80 =====  
NUC80 1H  
P80 1.00 usec  
PL80 0.00 dB  
SFO80 400.146000 MHz  
===== CHANNEL f81 =====  
NUC81 1H  
P81 1.00 usec  
PL81 0.00 dB  
SFO81 400.146000 MHz  
===== CHANNEL f82 =====  
NUC82 1H  
P82 1.00 usec  
PL82 0.00 dB  
SFO82 400.146000 MHz  
===== CHANNEL f83 =====  
NUC83 1H  
P83 1.00 usec  
PL83 0.00 dB  
SFO83 400.146000 MHz  
===== CHANNEL f84 =====  
NUC84 1H  
P84 1.00 usec  
PL84 0.00 dB  
SFO84 400.146000 MHz  
===== CHANNEL f85 =====  
NUC85 1H  
P85 1.00 usec  
PL85 0.00 dB  
SFO85 400.146000 MHz  
===== CHANNEL f86 =====  
NUC86 1H  
P86 1.00 usec  
PL86 0.00 dB  
SFO86 400.146000 MHz  
===== CHANNEL f87 =====  
NUC87 1H  
P87 1.00 usec  
PL87 0.00 dB  
SFO87 400.146000 MHz  
===== CHANNEL f88 =====  
NUC88 1H  
P88 1.00 usec  
PL88 0.00 dB  
SFO88 400.146000 MHz  
===== CHANNEL f89 =====  
NUC89 1H  
P89 1.00 usec  
PL89 0.00 dB  
SFO89 400.146000 MHz  
===== CHANNEL f90 =====  
NUC90 1H  
P90 1.00 usec  
PL90 0.00 dB  
SFO90 400.146000 MHz  
===== CHANNEL f91 =====  
NUC91 1H  
P91 1.00 usec  
PL91 0.00 dB  
SFO91 400.146000 MHz  
===== CHANNEL f92 =====  
NUC92 1H  
P92 1.00 usec  
PL92 0.00 dB  
SFO92 400.146000 MHz  
===== CHANNEL f93 =====  
NUC93 1H  
P93 1.00 usec  
PL93 0.00 dB  
SFO93 400.146000 MHz  
===== CHANNEL f94 =====  
NUC94 1H  
P94 1.00 usec  
PL94 0.00 dB  
SFO94 400.146000 MHz  
===== CHANNEL f95 =====  
NUC95 1H  
P95 1.00 usec  
PL95 0.00 dB  
SFO95 400.146000 MHz  
===== CHANNEL f96 =====  
NUC96 1H  
P96 1.00 usec  
PL96 0.00 dB  
SFO96 400.146000 MHz  
===== CHANNEL f97 =====  
NUC97 1H  
P97 1.00 usec  
PL97 0.00 dB  
SFO97 400.146000 MHz  
===== CHANNEL f98 =====  
NUC98 1H  
P98 1.00 usec  
PL98 0.00 dB  
SFO98 400.146000 MHz  
===== CHANNEL f99 =====  
NUC99 1H  
P99 1.00 usec  
PL99 0.00 dB  
SFO99 400.146000 MHz  
===== CHANNEL f100 =====  
NUC100 1H  
P100 1.00 usec  
PL100 0.00 dB  
SFO100 400.146000 MHz

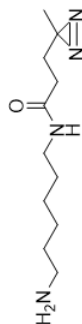

190 180 170 160 150 140 130 120 110 100 90 80 70 60 50 40 30 20 10 ppm



|                             |                |
|-----------------------------|----------------|
| F2 - Acquisition Parameters |                |
| Date_                       | 2050721        |
| Time                        | 21.39          |
| INSTRUM                     | spect          |
| PROBHD                      | 5 mm DUL 13C-1 |
| PULPROG                     | zg30           |
| ID                          | 32168          |
| SOLVENT                     | CDCl3          |
| NS                          | 17             |
| DS                          | 0              |
| RG                          | 640.356 Hz     |
| RGH                         | 0.95625 Hz     |
| FIDRES                      | 0.1559540 sec  |
| AQ                          | RG 406         |
| RG                          | 406            |
| RGH                         | 78.000 usec    |
| RDW                         | 6.00 usec      |
| DE                          | 300.0 K        |
| TE                          | 2.00000000 sec |
| DD1                         |                |
| ID0                         |                |

```

===== CHANNEL f1 =====
NUC1
P1      10.00 usec
C1      -3.474
SF01    400.152810 MHz
=====
E2 - Processing parameters
SI      1.3984
SF      400.150168 MHz
EM
NDW
SSB     0
LB      0 Hz
GB      0
PC      1.00
=====

```

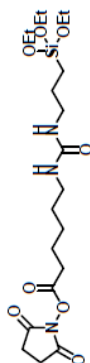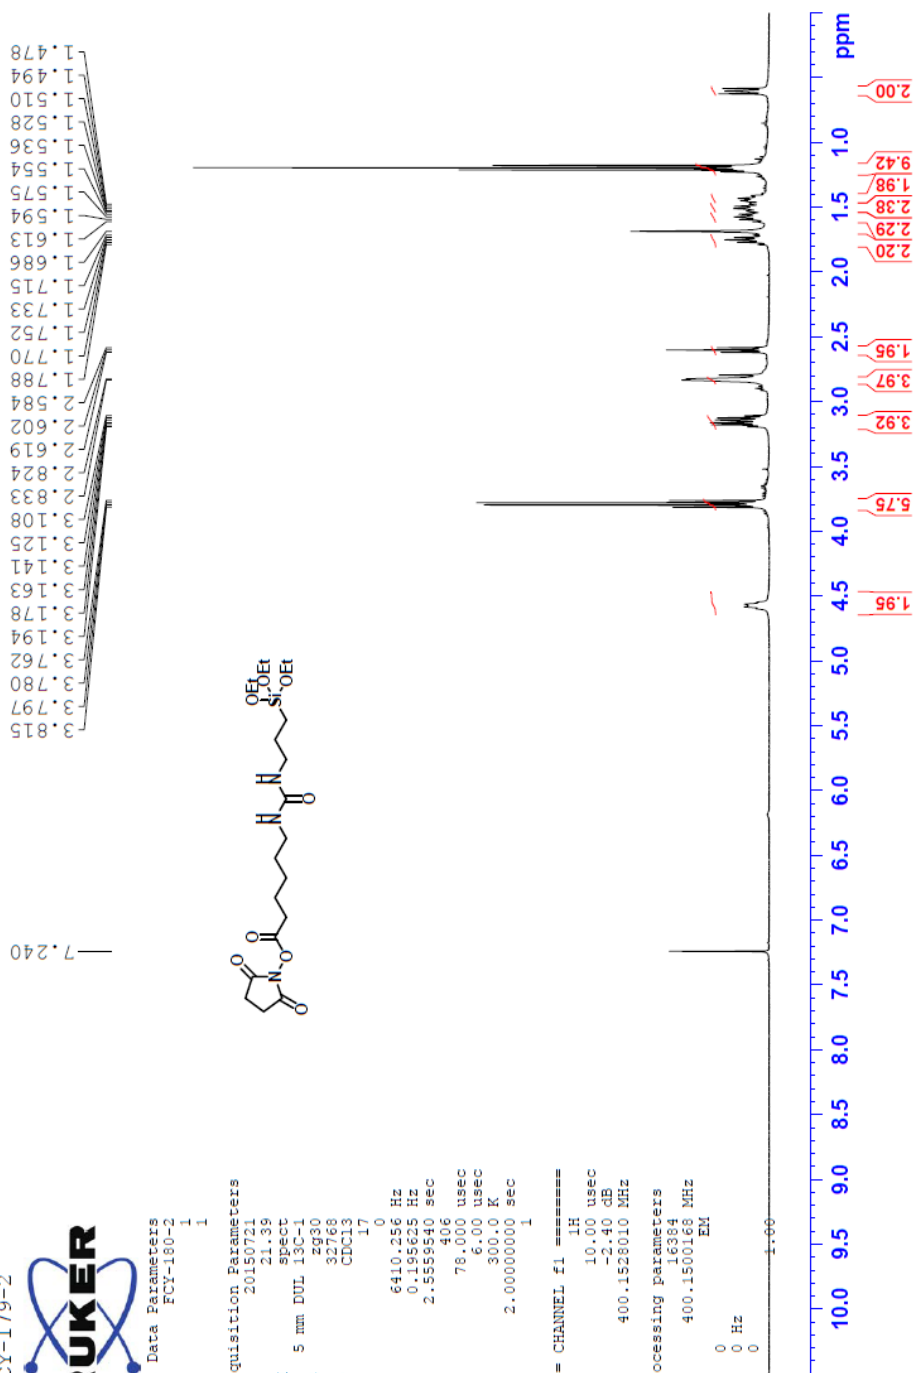

FCY-180-C

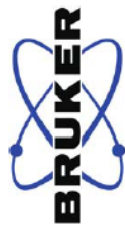

Current Data Parameters  
NAME FCY-180-C  
EXPNO 1  
PROCNO 1

F2 - Processing Parameters  
SI 65836  
SF 100.521472 MHz  
WDW EM  
SSB 0  
LB 0.30 Hz  
GB 0  
PC 1.00

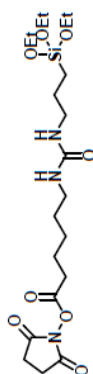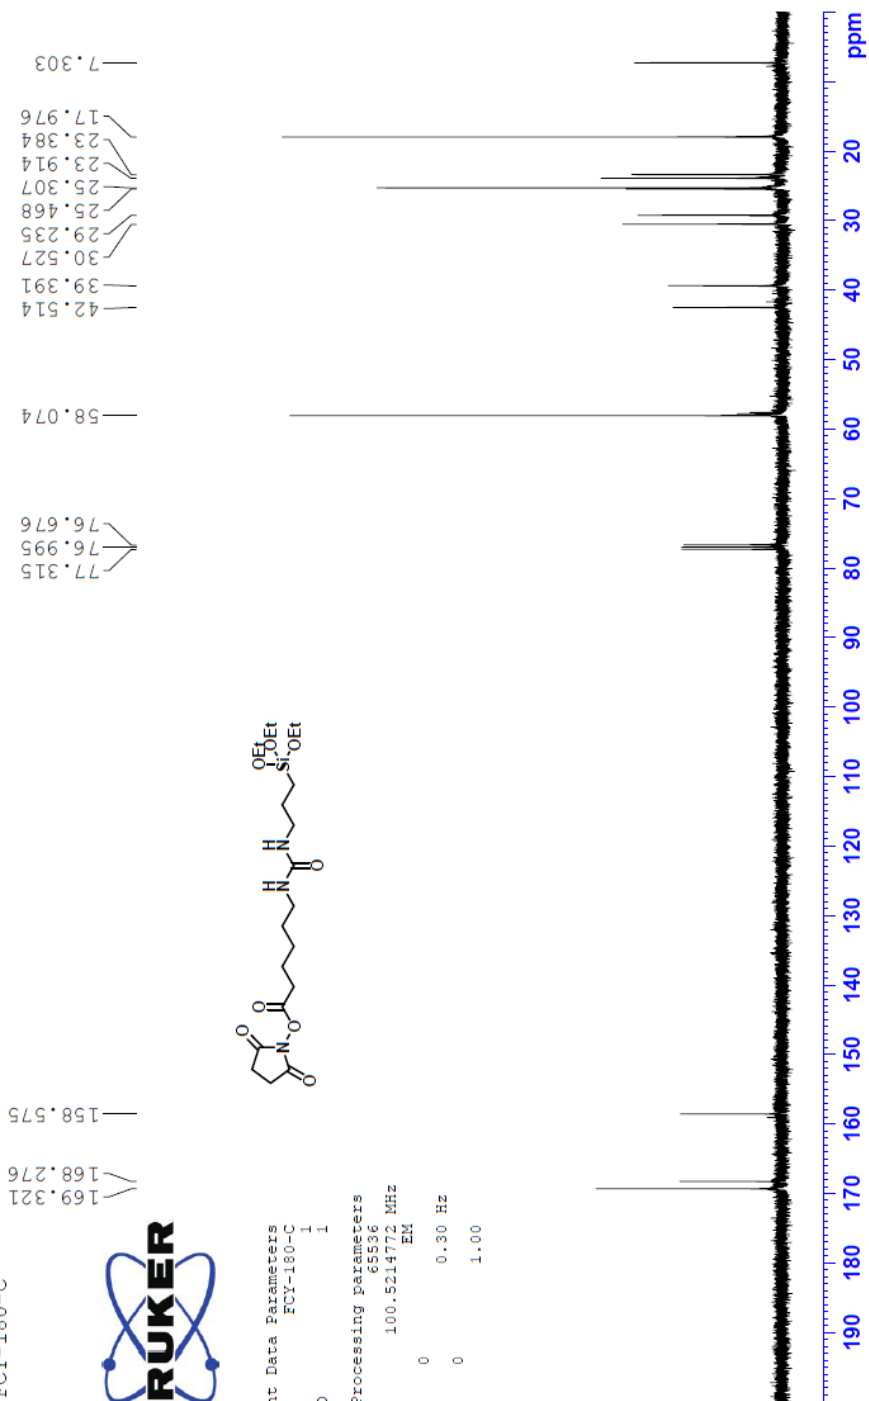

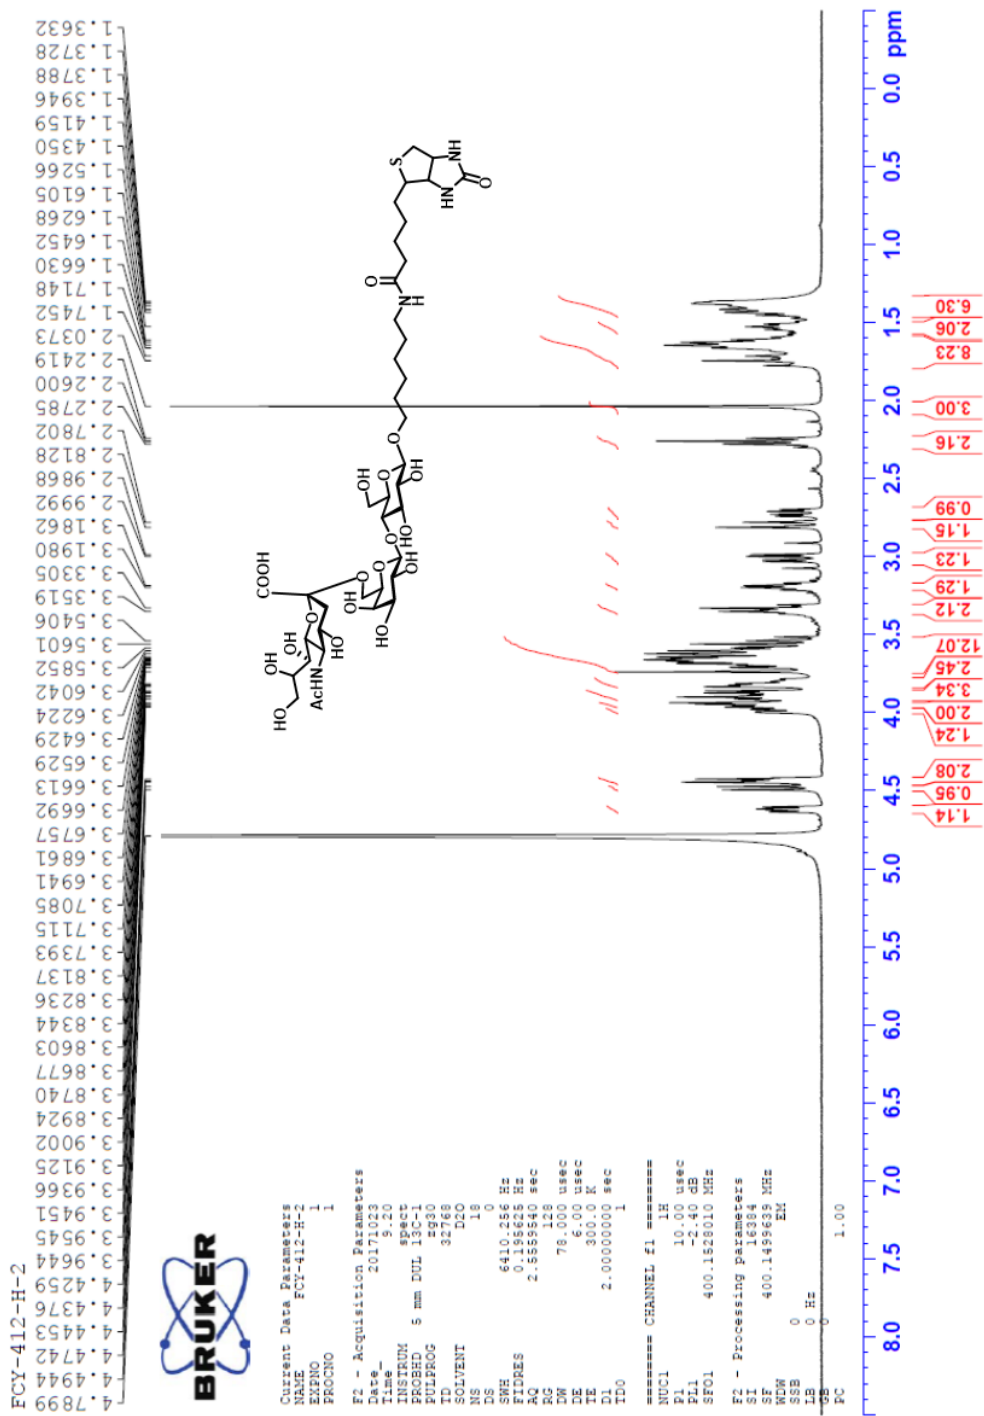

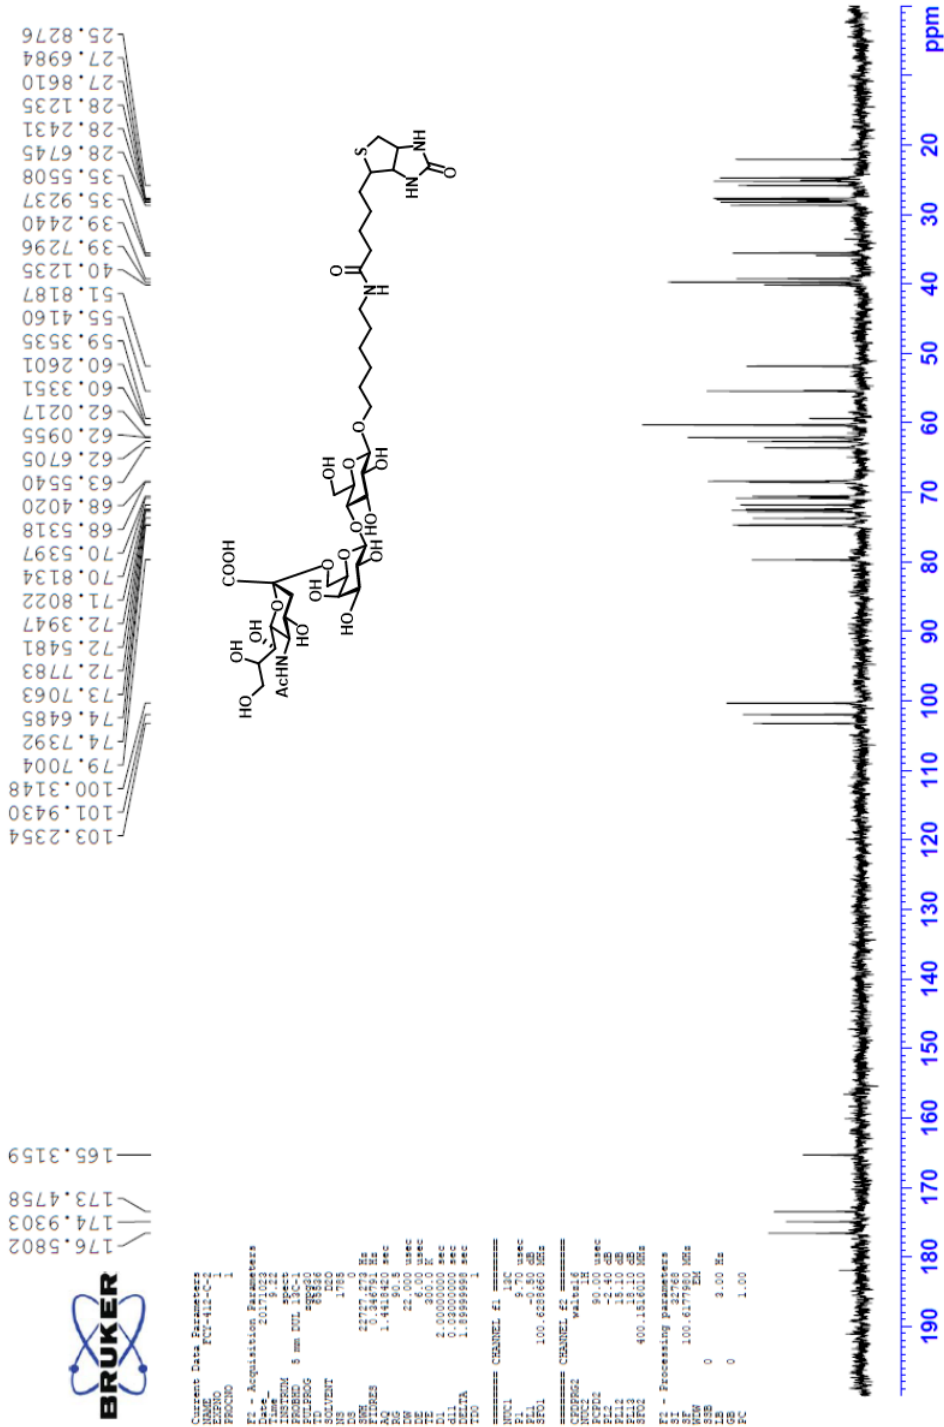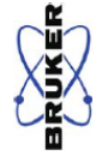

Current Data Parameters  
 EXPNO 1  
 PROCNO 1  
 F2 - Acquisition Parameters  
 Date\_ 20171023  
 Time 8:12  
 INSTRUM spect  
 PRGNAME 8 mm BBO 1D-1  
 F2 - Processing Parameters  
 SI 32768  
 SF 400.1416010 MHz  
 D1 2.0000000 sec  
 d11 0.0000000 sec  
 DELTA 1.8999999 sec  
 DEC 1  
 ===== CHANNEL f1 =====  
 NUCL1 13C  
 P1 9.70 usec  
 PL1 0.00 dB  
 SFO1 100.625000 MHz  
 ===== CHANNEL f2 =====  
 NUC2 1H  
 P2 9.00 usec  
 PL2 0.00 dB  
 SFO2 400.1416010 MHz  
 F2 - Processing Parameters  
 SI 32768  
 SF 400.1416010 MHz  
 D1 2.0000000 sec  
 d11 0.0000000 sec  
 DELTA 1.8999999 sec  
 DEC 1

Ref:

1. Tohru Kambe, Bruno E. Correia, Micah J. Niphakis, Benjamin F. Cravatt *J. Am. Chem. Soc.* **2014**, *136*, 10777–10782.
2. Hai Yu, Shengshu Huang, Harshal Chokhawala, Mingchi Sun, Haojie Zheng, Xi Chen *Angew. Chem. Int. Ed.* **2006**, *45*, 3938 –3944.
